# Supplementary material for: Fabrication of Composite Nanoparticle Stabilized Pickering Emulsions via Physicochemical and Cross-linking Modified Soy Protein Isolate: Focused on fat substitution strategies and extrusion 3D printing
Source: Research Square preprint supplement (doi:10.21203/rs.3.rs-7864478/v1), 2025-11-12
Supplement: Supplementary file 2 [file 4e19bb141845cc381575a1af.docx]

Highlights

- Stable modified SPI cross-linked WPI nanoparticles were successfully constructed.
- The interface adsorption behavior of the nanoparticles was revealed by QCM-D.
- Nanoparticles enhanced the stability and viscoelasticity of Pickering emulsion.
- The low-fat cream prepared with nanoparticles has a better foam blending rate.
- Nanoparticles have improved the printing accuracy of 3D printed products.
