# Supplementary figures and images for: Fabrication of Composite Nanoparticle Stabilized Pickering Emulsions via Physicochemical and Cross-linking Modified Soy Protein Isolate: Focused on fat substitution strategies and extrusion 3D printing
Source: Research Square preprint supplement (doi:10.21203/rs.3.rs-7864478/v1), 2025-11-12

**Graphic Abstract**

**
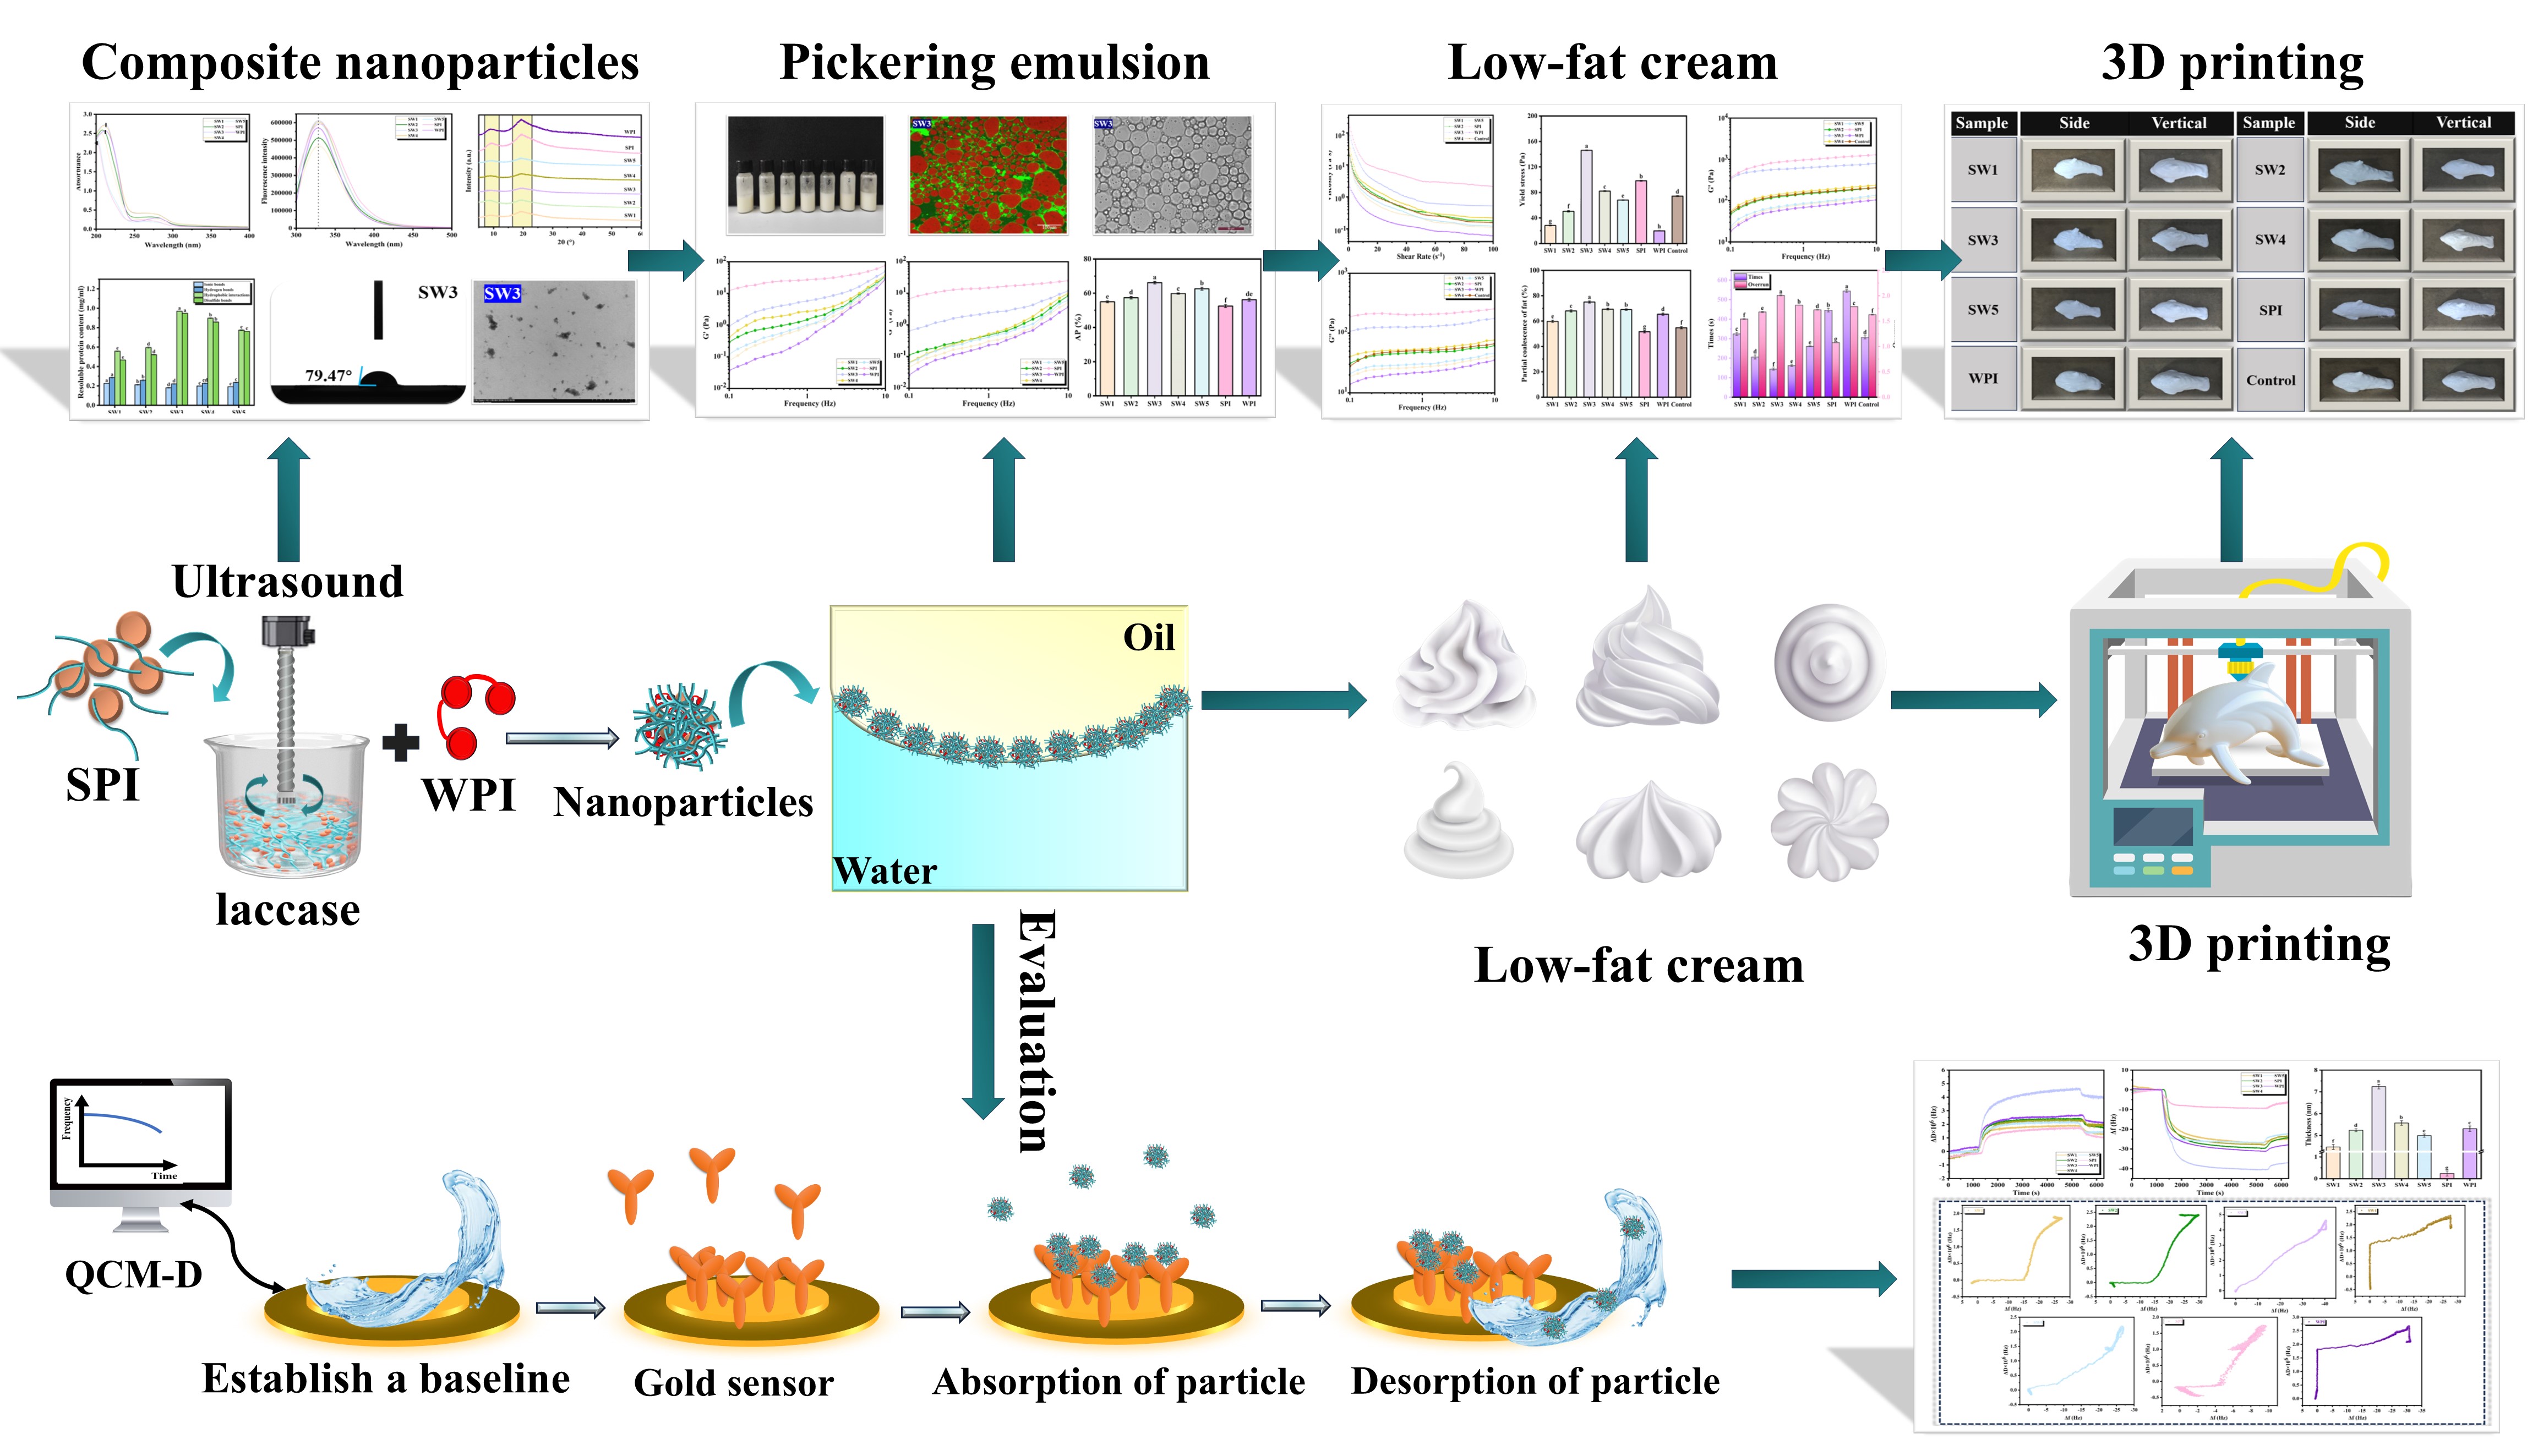
**

Supplement: Supplementary file 1 [file 3dd20e9687f4d6b83f2655b2.docx]
